# Supplementary material for: fLPS 2.0: rapid annotation of compositionally-biased regions in biological sequences
Source: PeerJ journal article supplement (doi:10.7717/peerj.12363), 2021-10-28
Supplement: Suppl-Fig-1-PLAAC.pdf [file Suppl-Fig-1-PLAAC.pdf]

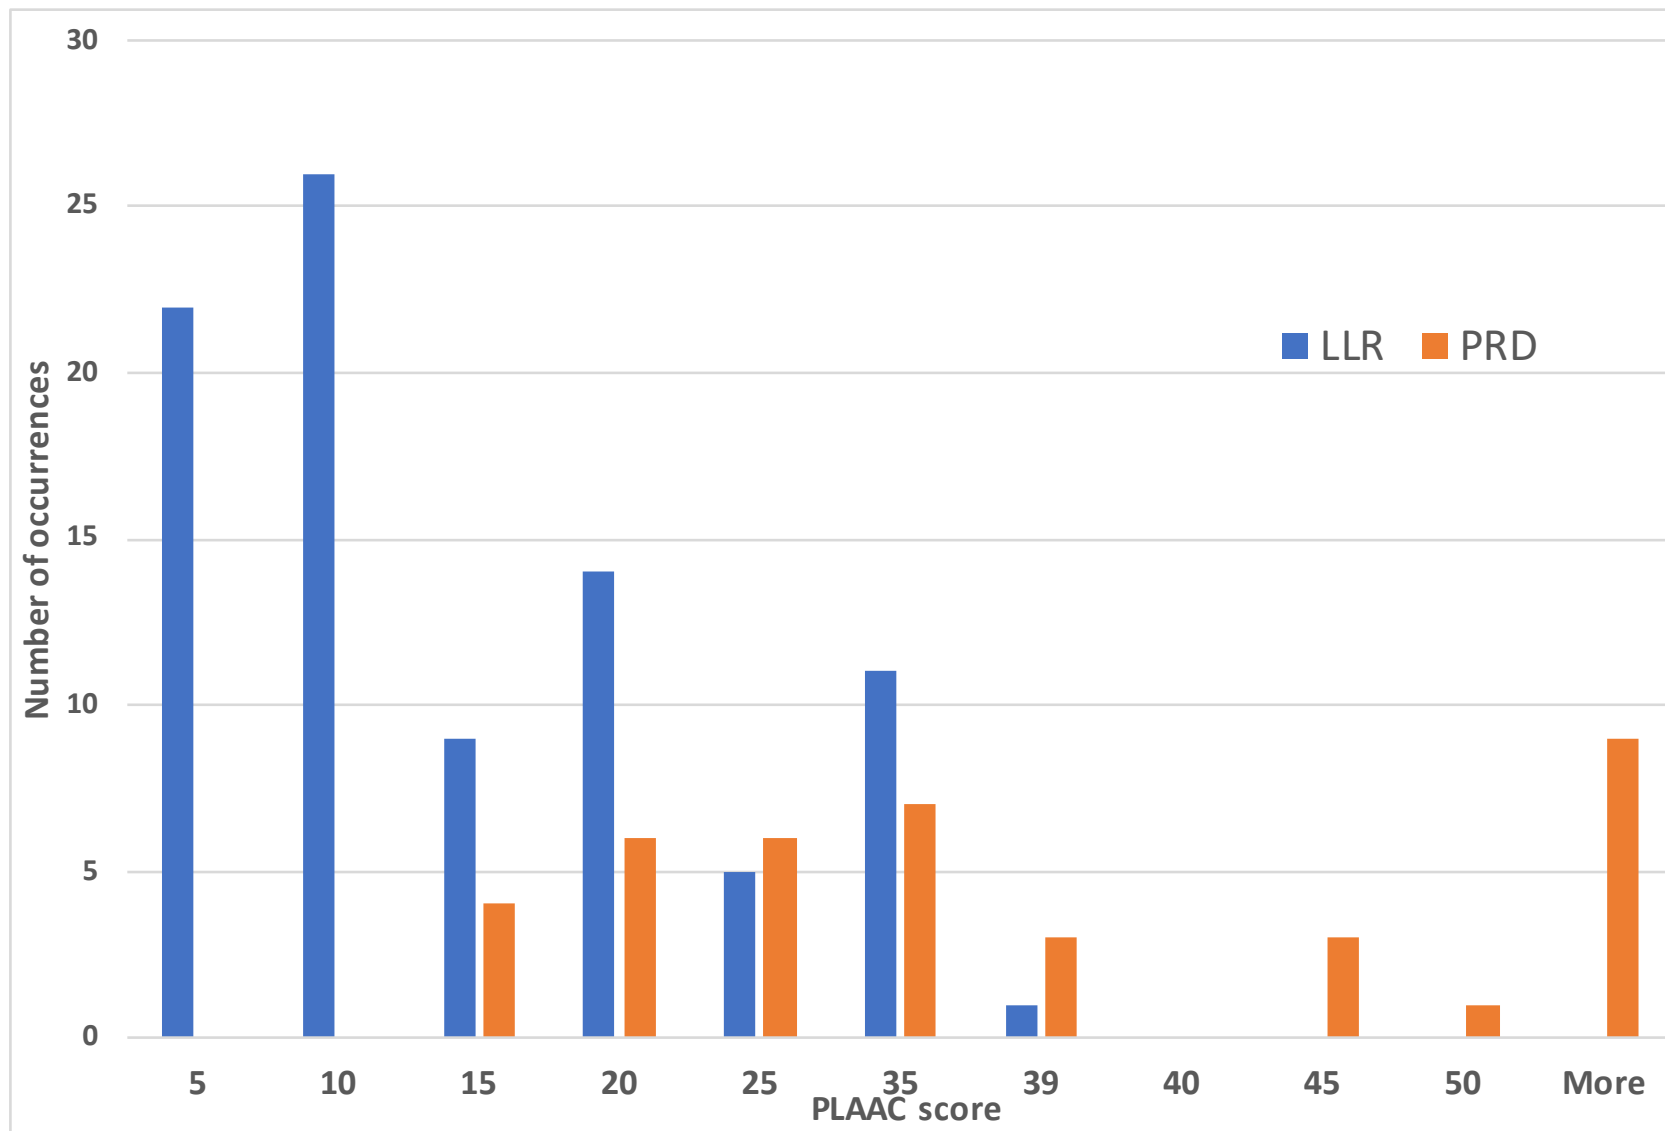

**Supplementary Figure 1: Annotations of prion-like domains are binned in histograms according to their PLAAC score (either the LLR score or PRD score). Bin 'x' holds all values in the range  $x-5.0$  to  $x$ .**
